# Supplementary material
Source: Elsevier journal article supplement (https://www.sciencedirect.com/science/article/pii/S0014256517301479)
Supplement: mmc1 [file S0014256517301479:mmc1.pdf]

Tabla 1\_Principales estudios sobre la evaluación competencial en Medicina

| 1 <sup>er</sup> Autor         | País        | Situación             | Instrumento                                           | Clasificación competencias |
|-------------------------------|-------------|-----------------------|-------------------------------------------------------|----------------------------|
| Nikendei C <sup>77</sup>      | Alemania    | Estudiantes Pregrado  | Cuestionario                                          | Específicas                |
| Hojat M <sup>76</sup>         | EEUU        | Estudiantes Pregrado  | Cuestionario                                          | Específicas                |
| Dannefer EF <sup>78</sup>     | EEUU        | Estudiantes Pregrado  | Cuestionario                                          | Nucleares                  |
| Domingues RC <sup>80</sup>    | Brasil      | Estudiantes Pregrado  | Cuestionario                                          | Nucleares y Específicas    |
| Oates DJ <sup>79</sup>        | EEUU        | Estudiantes Pregrado  | Cuestionario                                          | Nucleares y Específicas    |
| Rademakers J <sup>4</sup>     | Holanda     | Estudiantes Pregrado  | Cuestionario                                          | Nucleares y Específicas    |
| Hojat M <sup>81</sup>         | EEUU        | Estudiantes Pregrado  | Cuestionario                                          | Nucleares y Específicas    |
| Caverzagie K <sup>82</sup>    | EEUU        | Estudiantes Postgrado | Cuestionario                                          | Nucleares                  |
| Stewart J <sup>83</sup>       | Reino Unido | Estudiantes Postgrado | Cuestionario                                          | Nucleares                  |
| Buss MD <sup>84</sup>         | EEUU        | Estudiantes Postgrado | Cuestionario                                          | Nucleares y Específicas    |
| Knobe M <sup>19</sup>         | Alemania    | Estudiantes Pregrado  | ECOE                                                  | Específicas                |
| Martin IG <sup>20</sup>       | Australia   | Estudiantes Pregrado  | ECOE                                                  | Específicas                |
| Diachun L <sup>16</sup>       | Canadá      | Estudiantes Pregrado  | ECOE                                                  | Específicas                |
| Fliegel JE <sup>17</sup>      | EEUU        | Estudiantes Pregrado  | ECOE                                                  | Específicas                |
| Simon SR <sup>23</sup>        | EEUU        | Estudiantes Pregrado  | ECOE                                                  | Específicas                |
| Payne NJ <sup>21</sup>        | EEUU        | Estudiantes Pregrado  | ECOE                                                  | Específicas                |
| Smith MA <sup>24</sup>        | EEUU        | Estudiantes Pregrado  | ECOE                                                  | Específicas                |
| Pradhan A <sup>22</sup>       | EEUU        | Estudiantes Pregrado  | ECOE                                                  | Específicas                |
| Vivekananda P <sup>25</sup>   | Reino Unido | Estudiantes Pregrado  | ECOE                                                  | Específicas                |
| Hull P <sup>18</sup>          | Reino Unido | Estudiantes Pregrado  | ECOE                                                  | Específicas                |
| Shapiro J <sup>30</sup>       | EEUU        | Estudiantes Pregrado  | ECOE                                                  | Nucleares                  |
| Chen DC <sup>26</sup>         | EEUU        | Estudiantes Pregrado  | ECOE                                                  | Nucleares                  |
| Ishikawa H <sup>28</sup>      | Japón       | Estudiantes Pregrado  | ECOE                                                  | Nucleares                  |
| Perera J <sup>29</sup>        | Malasia     | Estudiantes Pregrado  | ECOE                                                  | Nucleares                  |
| Dikici MF <sup>27</sup>       | Turquía     | Estudiantes Pregrado  | ECOE                                                  | Nucleares                  |
| Junger J <sup>33</sup>        | Alemania    | Estudiantes Pregrado  | ECOE                                                  | Nucleares y Específicas    |
| Peeraer G <sup>34</sup>       | Bélgica     | Estudiantes Pregrado  | ECOE                                                  | Nucleares y Específicas    |
| Wilkinson TJ <sup>36</sup>    | Canadá      | Estudiantes Pregrado  | ECOE                                                  | Nucleares y Específicas    |
| Bergus GR <sup>31</sup>       | EEUU        | Estudiantes Pregrado  | ECOE                                                  | Nucleares y Específicas    |
| Iqbal M <sup>32</sup>         | Paquistán   | Estudiantes Pregrado  | ECOE                                                  | Nucleares y Específicas    |
| Wass V <sup>35</sup>          | Reino Unido | Estudiantes Pregrado  | ECOE vs análisis de casos                             | Nucleares y Específicas    |
| Hatala R <sup>39</sup>        | Canadá      | Estudiantes Postgrado | ECOE                                                  | Específicas                |
| Smith CA <sup>42</sup>        | EEUU        | Estudiantes Postgrado | ECOE                                                  | Específicas                |
| Hymowitz N <sup>40</sup>      | EEUU        | Estudiantes Postgrado | ECOE                                                  | Específicas                |
| Lee JD <sup>41</sup>          | EEUU        | Estudiantes Postgrado | ECOE                                                  | Específicas                |
| Jefferies A <sup>44</sup>     | Canadá      | Estudiantes Postgrado | ECOE                                                  | Nucleares                  |
| Harasym PH <sup>43</sup>      | Canadá      | Estudiantes Postgrado | ECOE                                                  | Nucleares                  |
| O'Sullivan P <sup>45</sup>    | EEUU        | Estudiantes Postgrado | ECOE                                                  | Nucleares                  |
| Wilson BE <sup>49</sup>       | EEUU        | Estudiantes Postgrado | ECOE                                                  | Nucleares y Específicas    |
| Wagner DP <sup>48</sup>       | EEUU        | Estudiantes Postgrado | ECOE                                                  | Nucleares y Específicas    |
| Kramer A <sup>46</sup>        | Holanda     | Estudiantes Postgrado | ECOE                                                  | Nucleares y Específicas    |
| Reece A <sup>47</sup>         | Reino Unido | Estudiantes Postgrado | ECOE                                                  | Nucleares y Específicas    |
| Laidlaw TS <sup>53</sup>      | Canadá      | En ejercicio          | ECOE                                                  | Nucleares                  |
| Chan CS <sup>52</sup>         | Hong Kong   | En ejercicio          | ECOE                                                  | Nucleares                  |
| Amiel GE <sup>51</sup>        | Israel      | En ejercicio          | ECOE                                                  | Nucleares                  |
| Pereira J <sup>50</sup>       | Canadá      | Estudiantes Postgrado | ECOE y cuestionarios                                  | Nucleares y Específicas    |
| Wimmers PF <sup>74</sup>      | Holanda     | Estudiantes Postgrado | Examen práctico y teórico, y puntuación del desempeño | Específicas                |
| Stimmel B <sup>38</sup>       | EEUU        | Estudiantes Postgrado | Paciente estandarizado                                | Específicas                |
| Ogrinc G <sup>75</sup>        | EEUU        | Estudiantes Postgrado | Pruebas de conocimiento                               | Nucleares                  |
| Girzadas DV <sup>37</sup>     | EEUU        | Estudiantes Postgrado | Simuladores                                           | Específicas                |
| Joshi R <sup>67</sup>         | EEUU        | Estudiantes Postgrado | Técnica 360 (cuestionario)                            | Nucleares                  |
| Thammasitboom S <sup>69</sup> | EEUU        | Estudiantes Postgrado | Técnica 360 (cuestionario)                            | Nucleares                  |
| Stark R <sup>68</sup>         | EEUU        | Estudiantes Postgrado | Técnica 360 (cuestionario)                            | Nucleares                  |
| Lockyer J <sup>60</sup>       | Canadá      | En ejercicio          | Técnica 360 (cuestionario)                            | Nucleares                  |
| Violato C <sup>64</sup>       | Canadá      | En ejercicio          | Técnica 360 (cuestionario)                            | Nucleares                  |
| Sargeant J <sup>61</sup>      | Canadá      | En ejercicio          | Técnica 360 (cuestionario)                            | Nucleares                  |
| Violato C <sup>65</sup>       | Canadá      | En ejercicio          | Técnica 360 (cuestionario)                            | Nucleares                  |
| Overeem K <sup>63</sup>       | Holanda     | En ejercicio          | Técnica 360 (cuestionario)                            | Nucleares                  |
| Archer JC <sup>58</sup>       | Reino Unido | En ejercicio          | Técnica 360 (cuestionario)                            | Nucleares                  |
| Whitehouse A <sup>66</sup>    | Reino Unido | En ejercicio          | Técnica 360 (cuestionario)                            | Nucleares                  |
| Lelliott P <sup>59</sup>      | Reino Unido | En ejercicio          | Técnica 360 (cuestionario)                            | Nucleares                  |
| Sargeant J <sup>62</sup>      | Canadá      | En ejercicio          | Técnica 360 (cuestionario)                            | Nucleares y Específicas    |

ECOE: Evaluación clínica objetiva estructurada; EEUU: Estados Unidos de América
